# Supplementary material for: Electrochemical deposition of gold nanoparticles on carbon ultramicroelectrode arrays
Source: Royal Society of Chemistry journal article supplement (doi:10.1039/d4nr02326a), 2024-01-01
Supplement: d4nr02326a1.pdf [file d4nr02326a1.pdf]

## ELECTRONIC SUPPLEMENTARY INFORMATION

### **Electrochemical deposition of gold nanoparticles on carbon ultramicroelectrode arrays**

Courtney J. Weber,<sup>1</sup> Natalie E. Strom,<sup>1</sup> and Olja Simoska<sup>1,\*</sup>

*<sup>1</sup>Department of Chemistry and Biochemistry, University of South Carolina, 631 Sumter Street, Columbia, SC 29208*

\*Corresponding author: Dr. Olja Simoska (E-mail: [osimoska@mailbox.sc.edu](mailto:osimoska@mailbox.sc.edu))

## Contents

## Page No.

|                                                                                                                |     |
|----------------------------------------------------------------------------------------------------------------|-----|
| Cyclic voltammograms of supporting electrolyte solution on AuNP-modified vs. bare CUAs .....                   | S3  |
| EDX results of AuNPs on the CUA surface from SEM images .....                                                  | S4  |
| SEM images and size histograms of AuNPs on CUA surfaces for 25 $\mu\text{M}$ of $\text{HAuCl}_4$ .....         | S5  |
| SEM images and size histograms of AuNPs on CUA surfaces for 100 $\mu\text{M}$ of $\text{HAuCl}_4$ .....        | S6  |
| Lower magnification SEM images of AuNP coverage on the CUA surface .....                                       | S7  |
| Cyclic voltammograms of ferrocenemethanol on CUAs and carbon Macro electrodes .....                            | S8  |
| Comparison of amperograms for AuNP electrodeposition on CUAs at different potentials .....                     | S9  |
| Representative amperogram for AuNP electrodeposition on carbon Macro electrodes .....                          | S10 |
| Determination of AuNP amount .....                                                                             | S11 |
| Cyclic voltammograms of AuNP-modified vs. bare Macro electrodes for comparison of HER catalytic activity ..... | S12 |
| References .....                                                                                               | S13 |

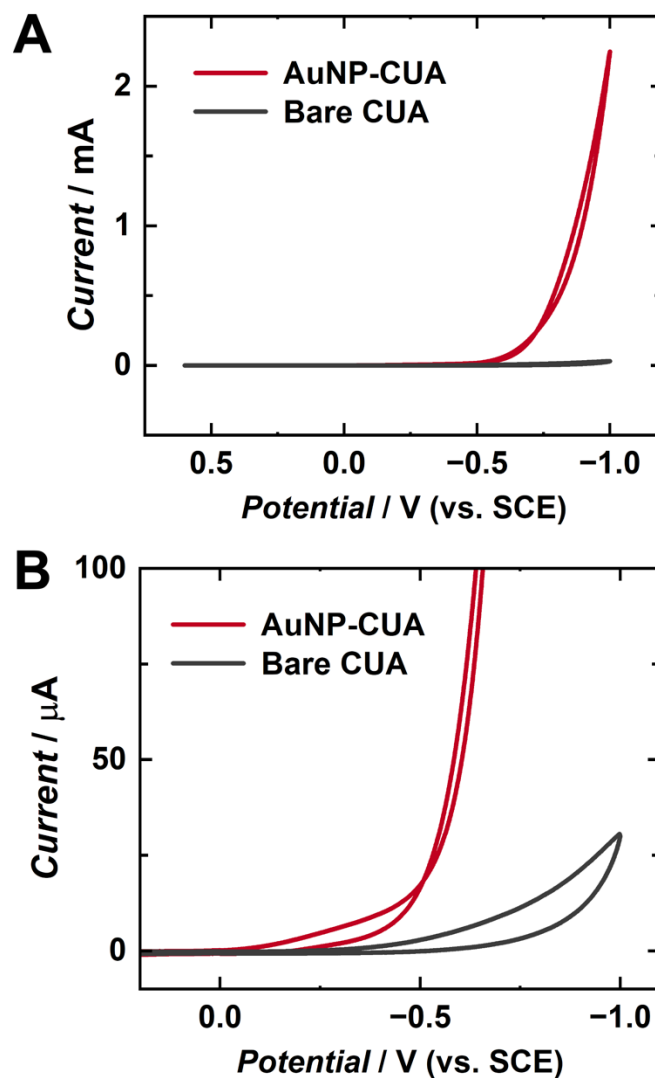

**Fig. S1** Cyclic voltammetric (CV) comparison of 0.5 M  $\text{H}_2\text{SO}_4$  at a scan rate of  $100 \text{ mV s}^{-1}$  at gold nanoparticle-modified carbon ultramicroelectrode arrays (AuNP-CUAs) versus a bare CUA surface, displayed as the red and gray traces, respectively. The electrodeposition parameters for the AuNP-CUA were  $-0.5 \text{ V vs. SCE}$  for 5 s in a solution of  $50 \text{ } \mu\text{M HAuCl}_4$  with  $0.5 \text{ M H}_2\text{SO}_4$ . Different CV current ( $x$ -axis) and potential ( $y$ -axis) windows were plotted to observe changes in kinetics and applied potential in the system: (A) Large window of full CV displaying a significant increase in cathodic current and (B) Narrow CV window showing a positive potential shift in the onset of hydrogen evolution reaction (HER).

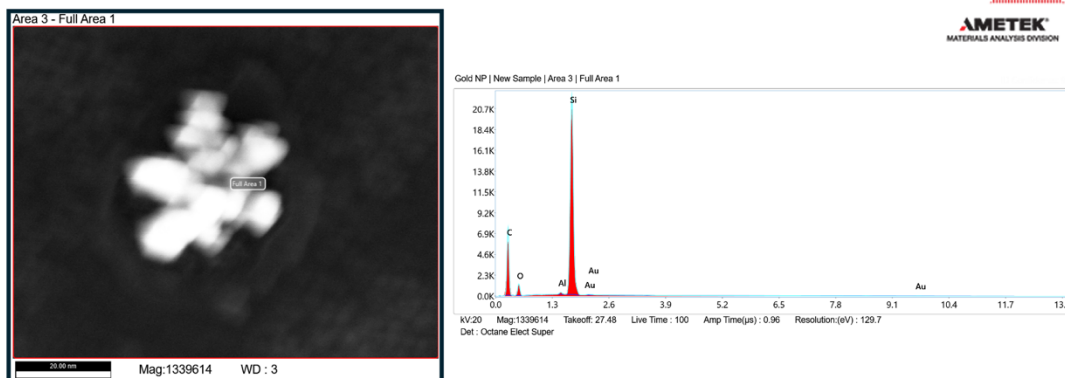
**eZAF Quant Result - Analysis Uncertainty: 11.92 %**

| Element | Weight % | MDL  | Atomic % | Error % | Net Int. | R      | A      | F      |
|---------|----------|------|----------|---------|----------|--------|--------|--------|
| C K     | 67.1     | 0.29 | 79.7     | 10.9    | 406.5    | 0.9250 | 0.0554 | 1.0000 |
| O K     | 10.4     | 0.23 | 9.3      | 11.6    | 77.9     | 0.9340 | 0.0555 | 1.0000 |
| Al K    | 0.2      | 0.04 | 0.1      | 10.6    | 17.6     | 0.9500 | 0.6269 | 1.0208 |
| Si K    | 21.4     | 0.04 | 10.8     | 3.9     | 1852.2   | 0.9526 | 0.7351 | 1.0032 |
| Au L    | 0.9      | 1.63 | 0.1      | 52.7    | 2.6      | 0.9909 | 0.9978 | 1.0737 |

**Fig. S2** Energy Dispersive X-Ray Spectroscopy (EDX) was performed on gold nanoparticles (AuNPs) on a single electrode in the carbon ultramicroelectrode arrays (CUAs) to ensure that the material being imaged via scanning electron microscopy (SEM) was gold. Several other elements were detected in addition to Au, including carbon (C) from the electrode material, oxygen and aluminum (O and Al) from the alumina layer, and silicon and oxygen (Si and O) from the quartz substrate.

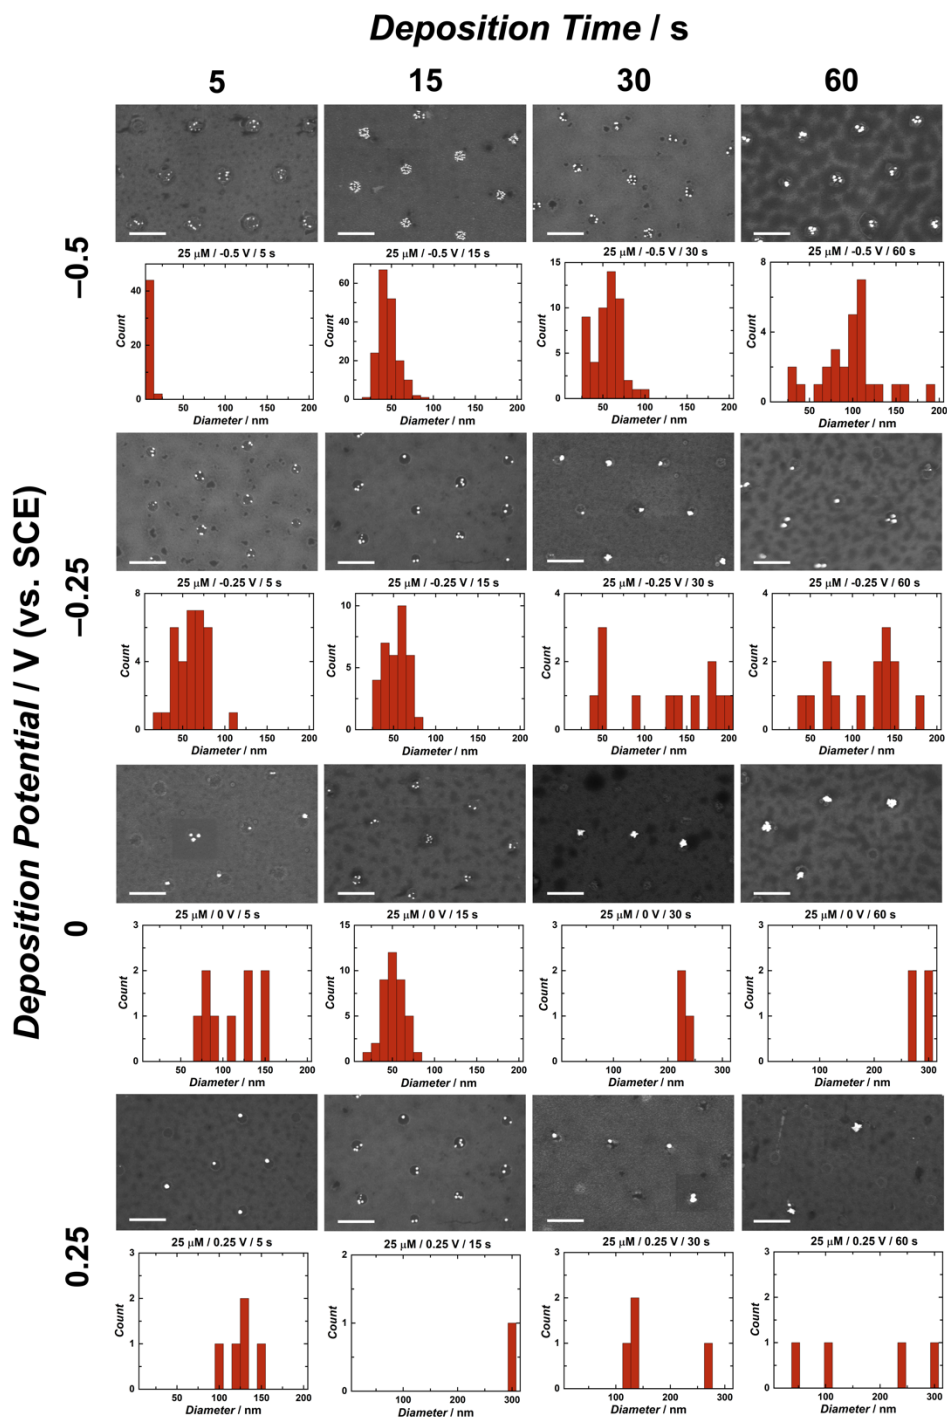

**Fig. S3** Representative scanning electron microscopy (SEM) images and particle size distribution histograms for all time and potential parameters for the electrodeposition of gold nanoparticles (AuNPs) on carbon ultramicroelectrode arrays (CUAs) in  $25 \mu\text{M}$   $\text{HAuCl}_4$  and  $0.5 \text{ M}$   $\text{H}_2\text{SO}_4$  solution. The SEM micrographs and histogram plots are arranged in order of increasing deposition time (from left to right) and decreasing reductive potential (from top to bottom). The scale bars represent  $1 \mu\text{m}$  for all SEM images. Particle diameter measurements were taken from nine individual electrodes in the CUA of the same area as shown in the respective SEM images for each.

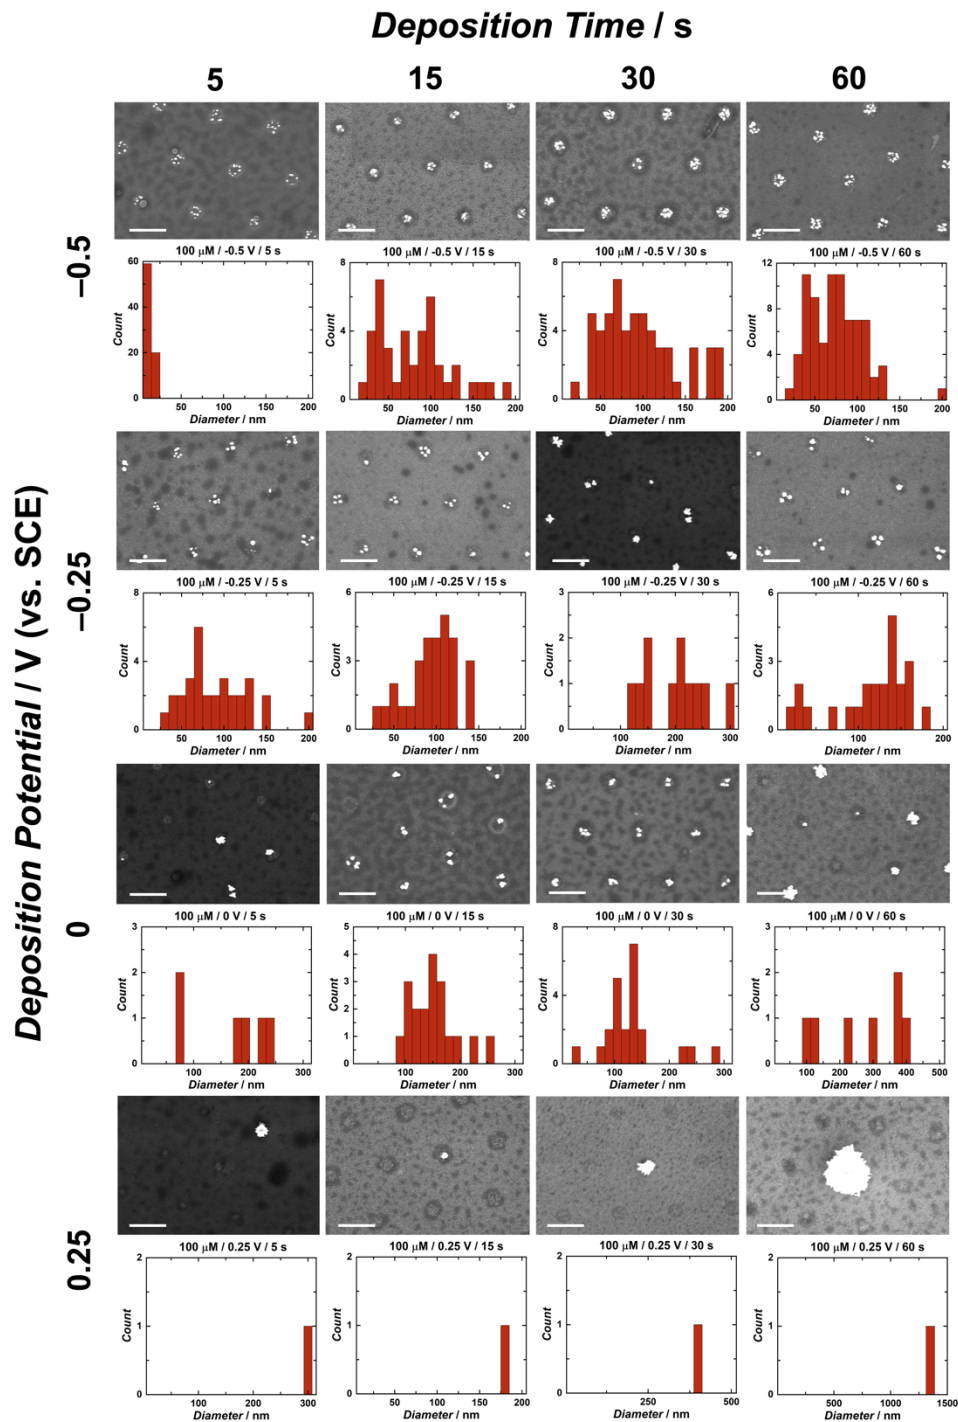

**Fig. S4** Representative scanning electron microscopy (SEM) images and particle size distribution histograms for all time and potential parameters for the electrodeposition of gold nanoparticles (AuNPs) on carbon ultramicroelectrode arrays (CUAs) in 100  $\mu\text{M}$   $\text{HAuCl}_4$  and 0.5 M  $\text{H}_2\text{SO}_4$  solution. The SEM micrographs and histogram plots are arranged in order of increasing deposition time (from left to right) and decreasing reductive potential (from top to bottom). The scale bars represent 1  $\mu\text{m}$  for all SEM images. Particle diameter measurements were taken from nine individual electrodes in the CUA of the same area as shown in the respective SEM images for each.

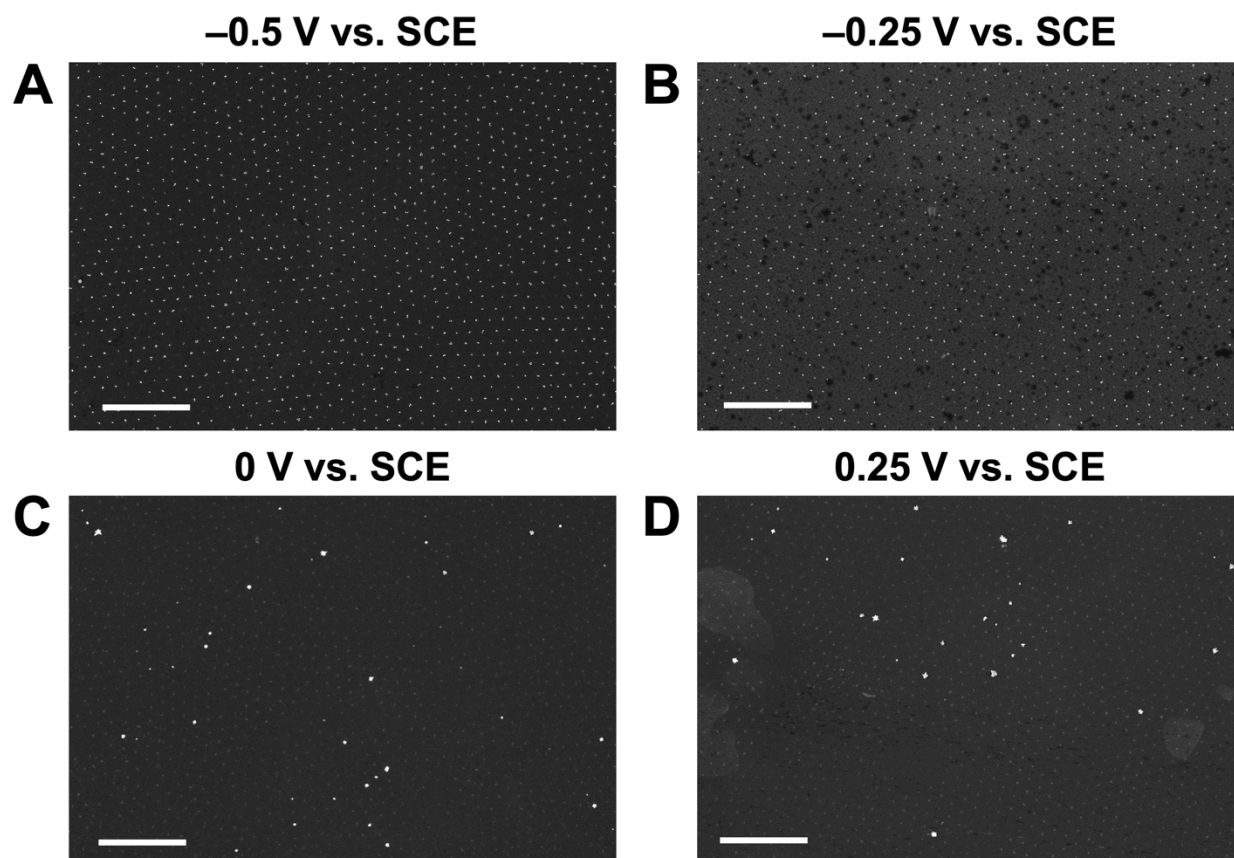

**Fig. S5** Representative scanning electron microscopy (SEM) images of gold nanoparticles (AuNPs) illustrating the coverage on the carbon ultramicroelectrode array (CUA) surfaces at electrodeposition potentials of (A)  $-0.5$  V, (B)  $-0.25$  V, (C)  $0$  V, and (D)  $0.25$  V vs. SCE. Deposition times of  $30$  s and  $\text{HAuCl}_4$  concentrations of  $50$   $\mu\text{M}$  were the same for all four samples. Scale bars represent  $10$   $\mu\text{m}$  for all SEM images. Note: In part (A), a few ultramicroelectrodes in the CUA array may appear less bright at this SEM resolution; however, SEM images at higher resolution confirm that they still have AuNPs deposited on them.

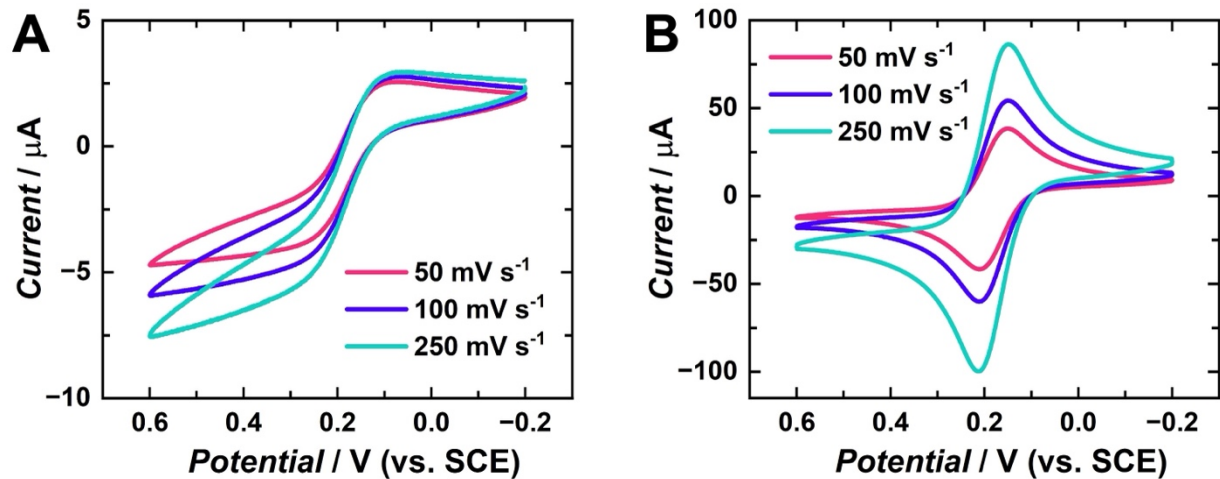

**Fig. S6** Cyclic voltammograms of the (A) carbon ultramicroelectrode arrays (CUAs) (1.4 % exposed carbon electrode area) and (B) planar, carbon Macro electrodes (100% exposed carbon electrode area) at scan rates of 50, 100, and 250  $\text{mV s}^{-1}$  using 500  $\mu\text{M}$  ferrocenemethanol in a supporting electrolyte solution containing 0.5 M KCl.



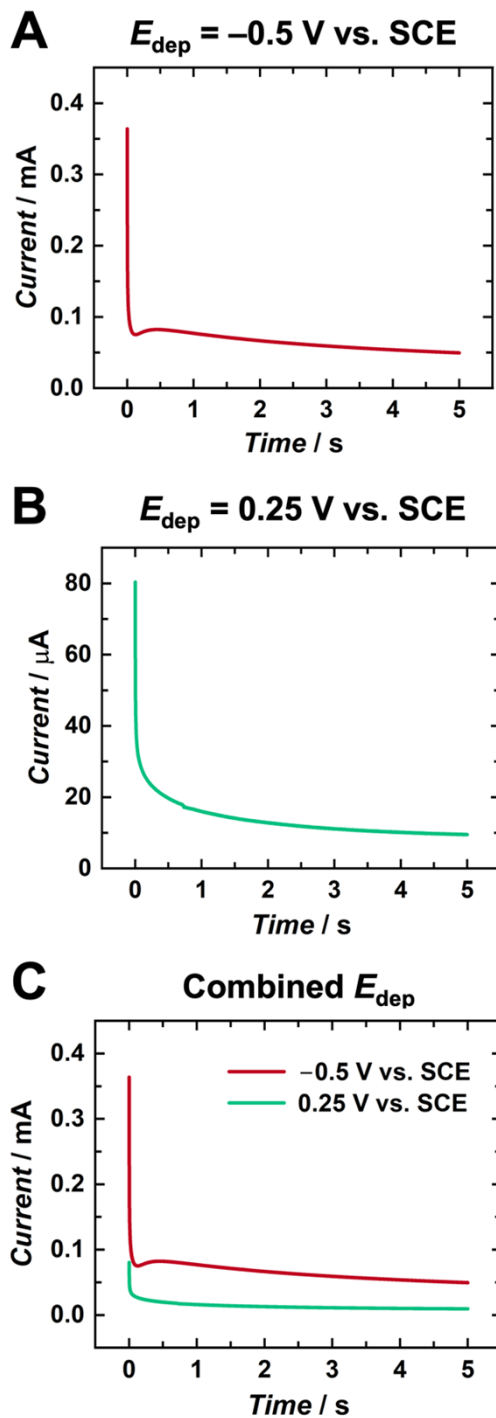

**Fig. S7** Amperometric current-time ( $i-t$ ) profiles for the electrodeposition of gold nanoparticles (AuNPs) on carbon ultramicroelectrode arrays (CUAs) with 1.4% exposed carbon area. The potential was stepped to (A)  $-0.5 \text{ V}$  and (B)  $0.25 \text{ V}$  vs. SCE for a deposition time of 5 s in a solution containing  $0.5 \text{ M H}_2\text{SO}_4$  and  $50 \mu\text{M HAuCl}_4$ . (C) Overlay of amperograms from (A) and (B) to display the dependence of the resulting current output, charged passed, and amount of gold deposited, on the applied electrodeposition potential. This data at the two different electrodeposition potentials was used to determine amounts of gold deposited on the CUA electrodes, which are reported in Table 1.

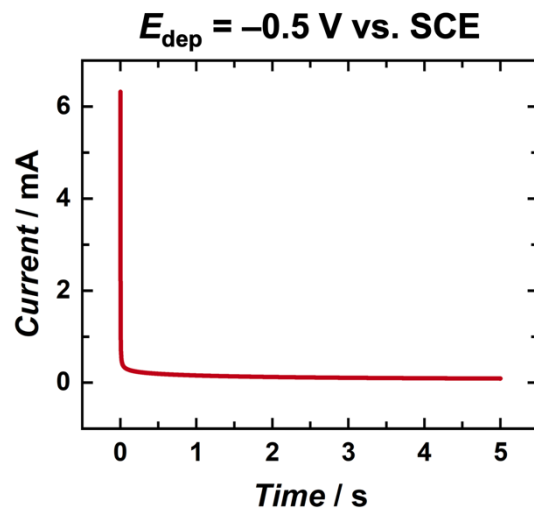

**Fig. S8** Amperometric current-time ( $i$ - $t$ ) profile for the electrodeposition of gold nanoparticles (AuNPs) on carbon Macro electrode (pyrolyzed photoresist film only) with 100% exposed carbon area. The potential was stepped to  $-0.5 \text{ V vs. SCE}$  for a deposition time of 5 s in a solution containing  $0.5 \text{ M H}_2\text{SO}_4$  and  $50 \mu\text{M HAuCl}_4$ . Data was used to determine amounts of gold deposited on Macro electrode, which are reported in Table 1.

### Determination of gold nanoparticle (AuNP) amount

Faraday's law was utilized to determine the amount of gold on the CUA surfaces.<sup>1, 2</sup> Faraday's law, displayed in **Equation S1**, establishes a correlation between charge and amount of chemical substance in moles:

$$Q = nNF \quad \text{(Eq. S1)}$$

In this equation,  $Q$  represents total charge passed through the system in Coulombs (C),  $n$  indicates the number of electrons transferred in the associated redox reaction,  $N$  symbolizes the amount of species present in moles (mol), and  $F$  designates Faraday's constant (96,485 C mol<sup>-1</sup>). The total charge was determined experimentally by integrating the area under amperometric curve from 0.5–5 s (**Figure S6**). The first 10% of points in this curve were excluded from the calculation due to contributions from non-faradaic, charging current early in the amperometric trace.<sup>1</sup> The number of electrons ( $n$ ) equals 3, given the redox reaction of Au<sup>3+</sup> to solid Au<sup>0</sup> (**Equation 1**).

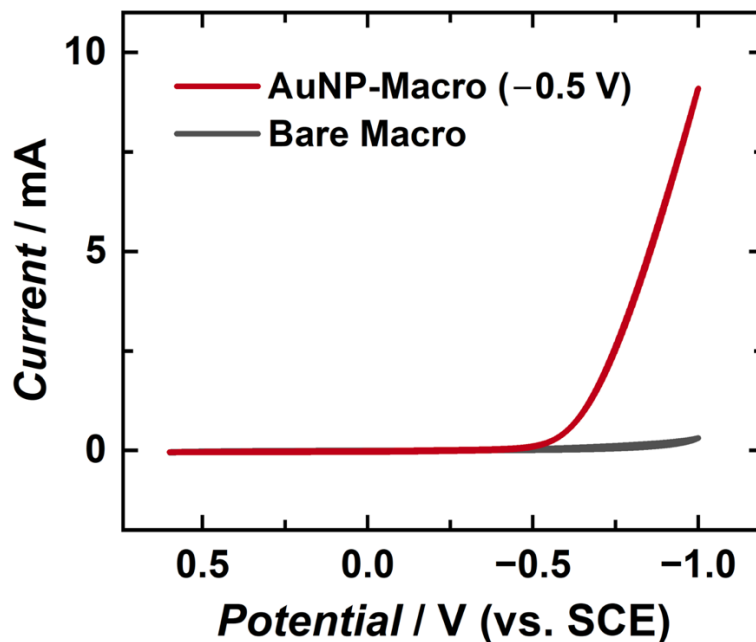

**Fig. S9** Cyclic voltammetric current-potential ( $i$ - $E$ ) traces of the hydrogen evolution reaction (HER) in 0.5 M  $\text{H}_2\text{SO}_4$ . The bare Macro electrode (gray trace) does not contain AuNPs. For the AuNP-modified Macro electrode (red trace), the deposition potential, deposition time, and  $\text{HAuCl}_4$  concentration were  $-0.5$  V vs. SCE, 5 s, and 50  $\mu\text{M}$ , respectively. The voltammograms are representative average from  $n=3$  total replicates.

## References

1. O. Simoska and S. D. Minter, *Techniques in electroanalytical chemistry*, American Chemical Society, ACS In Focus, 2022.
2. A. J. Bard, L. R. Faulkner and H. S. White, *Electrochemical methods: fundamentals and applications*, John Wiley & Sons, Inc., 3rd edn., 2020.
